# Supplementary material for: Scabies Mite Inactive Serine Proteases Are Potent Inhibitors of the Human Complement Lectin Pathway
Source: PubMed Central journal article supplement (PMC4031079; doi:10.1371/journal.pntd.0002872), 2014-05-22
Supplement: pntd.0002872.s002.pdf [file pntd.0002872.s002.pdf]

**Table S2: Primer Sequences for SMIPP-S I1 Mutants**

| <b>Mutant</b> | <b>Primer ID</b>    | <b>Sequence 5' - 3'</b>                                  |
|---------------|---------------------|----------------------------------------------------------|
| I1-A          | K108A For           | GGATGGACTCAAAGTGCACCTGCTAAATTGCC                         |
|               | K108A Rev           | GGCAATTTAGCAGGTGCACTTTTGAGTCCATCC                        |
| I1-Q          | K108Q For           | GGATGGACTCAAAGTCAACCTGCTAAATTGCC                         |
|               | K108Q Rev           | GGCAATTTAGCAGGTTGACTTTTGAGTCCATCC                        |
| Mutant 4      | K10A Q11A K108A For | ACCGGTCGACAAAAGAATCAAAGGAGGTGAAAAACCGACATCGCAGCAGTACCTGG |
| I1            | I1 Pichia For       | ACCGGTCGACAAAAGAATCAAAGGAGGTGAAAAACCGACATCAAACAAG        |
| I1            | I1 Pichia Rev       | ACCGGCGGCCGCTTATGATTTCTTCTTAATTATATCTTGTATCCATGA         |
